# Supplementary material
Source: Research Square preprint supplement (doi:10.21203/rs.3.rs-9509094/v1)
Supplement: Supplementary file 1 [file 4ecdd773f65bf2f7c2808430.docx]

# Appendix A Third-party Python libraries

An appendix contains supplementary information that is not an essential part of the text itself but which may be helpful in providing a more comprehensive understanding of the research problem. The system is implemented in Python 3.10+ using the following primary open-source libraries.

**Table A1 Third-party Python libraries and versions**

| **Library** | **Version** | **Purpose** |
| --- | --- | --- |
| pandas | 2.3.3 | Data manipulation; time-series analysis |
| numpy | 2.4.1 | Numerical computing; matrix operations |
| scipy | 1.17.0 | Portfolio optimisation (minimize); statistical distributions |
| scikit-learn | — | KMeans clustering for regime detection; preprocessing |
| matplotlib | — | Chart generation (pie, bar, scatter, line) |
| yfinance | 1.0 | Market data from Yahoo Finance |
| nselib | 2.4.2 | NSE India market data |
| openpyxl | 3.1.5 | Excel file reading (fund data sheets) |
| aiohttp | 3.13.3 | Async HTTP client for API calls |
| pydantic | 2.12.5 | Data validation and settings management |
| beautifulsoup4 | 4.14.3 | HTML parsing for web-scraped data |
| requests | 2.32.5 | HTTP requests for API integration |
| growwapi | 1.5.0 | Groww brokerage API integration |
| exchange_calendars | 4.12 | Trading calendar (NSE holidays) |
| pandas_market_calendars | 5.2.4 | Market calendar integration |
